# Supplementary material
Source: PubMed Central journal article supplement (PMC2234141)

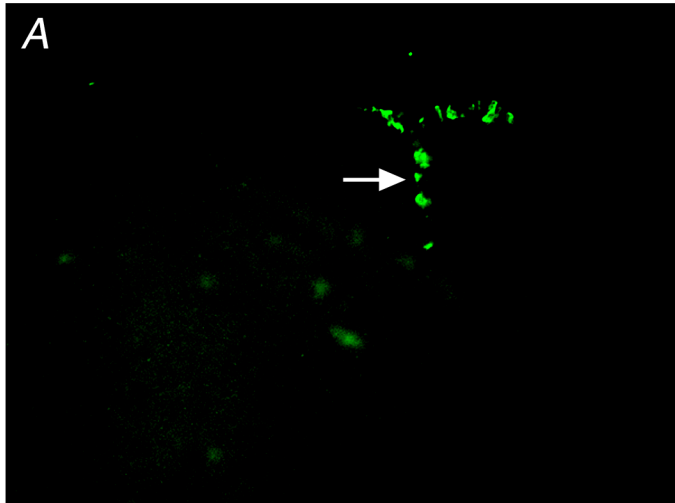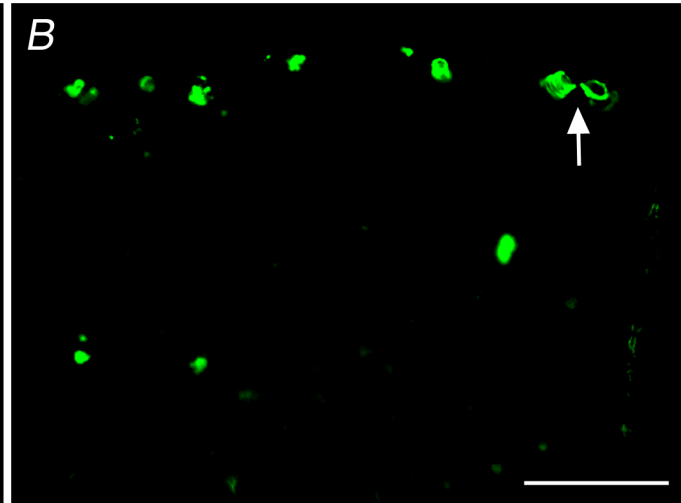

Supplement: pnas_0711568105_1.pdf [file pnas_0711568105_1.pdf]
